---

# BIRDSONG SEQUENCE EXHIBITS LONG CONTEXT DEPENDENCY COMPARABLE TO HUMAN LANGUAGE SYNTAX

---

A PREPRINT

Takashi Morita<sup>1</sup>

Hiroki Koda<sup>1</sup>

Kazuo Okanoya<sup>2</sup>

Ryosuke O. Tachibana<sup>2\*</sup>

<sup>1</sup>Primate Research Institute, Kyoto University, JAPAN

<sup>2</sup>Center for Evolutionary Cognitive Sciences, Graduate School of Arts and Sciences, the University of Tokyo, JAPAN

November 12, 2020

## ABSTRACT

Context dependency is a key feature in sequential structures of human language, which requires reference between words far apart in produced sequence. Assessing how long the past context has effect on the current status provides crucial information to understand the mechanism for complex sequential behaviors. Birdsongs serve as a representative model for studying the context dependency in sequential signals produced by non-human animals, while previous reports were upper bounded by methodological limitations. Here we show that birdsongs have a long context dependency comparable to grammatical structure in human language. We newly estimated the context dependency in birdsongs in a scalable way using a neural-network-based language model whose accessible context length is sufficiently long. Quantitative comparison with the parallel analysis of English sentences revealed that the context dependency in the birdsong was much shorter than that in the sentence, but was comparable to the grammatical structure when semantic factors were removed. Our findings are in accordance with the previous generalization in comparative studies that birdsong is more homologous to human language syntax than the entirety of human language including semantics.

**Keywords** birdsong, context dependency, Bengalese finch, language modeling, discrete variational autoencoder, unsupervised clustering, individual normalization

## 1 Introduction

2 Making behavioral decisions based on past information is a crucial task in the life of humans and animals live (Friston,  
3 2003, 2010; Friston and Stephan, 2007). Thus, it is an important inquiry in biology how far past events have an effect  
4 on animal behaviors. Such past records are not limited to observations of external environments, but also include  
5 behavioral history of oneself. A typical example is human language production; The appropriate choice of words to utter  
6 depends on previously uttered words/sentences. For example, we can tell whether ‘was’ or ‘were’ is the grammatical  
7 option after a sentence ‘*The photographs that were taken in the cafe and sent to Mary \_\_\_*’ only if we keep track of the  
8 previous words sufficiently long, at least up to ‘*photographs*’, and successfully recognize the two closer nouns (*cafe*  
9 and *station*) as modifiers rather than the main subject. Similarly, semantically plausible words are selected based on the  
10 topic of preceding sentences, as exemplified by the appropriateness of *olive* over *cotton* after “sugar” and “salt” are  
11 used in the same speech/document. Such dependence on the production history is called context dependency and is  
12 considered a characteristic property of human languages (Harris, 1945; Chomsky, 1957; Larson, 2017; Khandelwal  
13 et al., 2018; Dai et al., 2019).

14 Birdsongs serve as a representative case study of context dependency in sequential signals produced by non-human  
15 animals. Their songs are sound sequences that consist of brief vocal elements, or *syllables* (Hosino and Okanoya, 2000;

\*Corresponding Author: [rtachi@gmail.com](mailto:rtachi@gmail.com)

16 Okanoya, 2004). Previous studies have suggested that those birdsongs exhibit non-trivially long dependency on previous  
17 outputs (Katahira et al., 2011; Warren et al., 2012; Markowitz et al., 2013). Complex sequential patterns of syllables have  
18 been discussed in comparison with human language syntax from the viewpoint of formal linguistics (Okanoya, 2004;  
19 Berwick et al., 2011, 2012; Berwick and Chomsky, 2016). Neurological studies also revealed homologous network  
20 structures for the vocal production, recognition, and learning of songbirds and humans (Kuypers, 1958; Wild et al.,  
21 1997; Prather et al., 2008). In this line, assessing whether birdsongs exhibit long context dependency is an important  
22 instance in the comparative studies, and several previous studies have addressed this inquiry using computational  
23 methods (Katahira et al., 2011; Markowitz et al., 2013). However, the reported lengths of context dependency were  
24 measured using a limited language model (Markov/ $n$ -gram model) that was only able to access a few recent syllables  
25 in the context. Thus, it is unclear if those numbers were real dependency lengths in the birdsongs or merely model  
26 limitations. Moreover, the use of a limited language model is problematic for comparative studies because human  
27 languages are not modeled precisely by a Markov process (Chomsky, 1956; Rabin and Scott, 1959).

28 The present study aimed to assess the context dependency in songs of Bengalese finches (*Lonchura striata* var.  
29 *domestica*) using modern techniques for the natural language processing. Recent advancements in the machine learning  
30 field, particularly in artificial neural networks, provide powerful language models (Vaswani et al., 2017; Devlin et al.,  
31 2018; Dai et al., 2019), which are suitable for analyses of birdsong data, and can potentially refer to 200–900 syllables  
32 from the past when the data include such long dependency (Khandelwal et al., 2018; Dai et al., 2019). We performed  
33 the context dependency analysis in two steps: unsupervised classification of song syllables and context-dependent  
34 modeling of the classified syllable sequence. The classification allowed us to assess the sequential property of birdsongs  
35 in the same way as human language data. Moreover, it is preferable to have a common set of syllable categories, which  
36 is shared among classifications for all birds, to represent general patterns in the sequences. Conventional classification  
37 methods depending on manual labeling by human experts could spoil such generality due to arbitrariness in integrating  
38 the category sets across different birds. To satisfy these requirements, we employed a novel, end-to-end, unsupervised  
39 clustering method (“seq2seq ABCD-VAE”, see Fig. 1). Then, we assessed the context dependency in sequences of  
40 the classified syllables by measuring the effective context length (Khandelwal et al., 2018; Dai et al., 2019), which  
41 represents how much portion of the song production history impacts on the prediction performance of a language model.  
42 The language model we used (“Transformer”, see Fig. 3) behaves as a simulator of birdsong production, which exploits  
43 the longest context among currently available models (Vaswani et al., 2017; Devlin et al., 2018; Dai et al., 2019). The  
44 proposed method is data-agnostic and, thus, enabled a direct comparison between Bengalese finches’ songs and human  
45 language sentences.

46 Here, we demonstrate that the context dependency in Bengalese finch’s song is much shorter than in English sentences,  
47 but is slightly longer than and more comparable to the dependency in purely syntactic representation of the sentences,  
48 where words were replaced with grammatical category labels (such as noun and verb) to remove semantic information.  
49 These findings corroborate the idea that birdsong sequences are more homologous to human language syntax than  
50 the entirety of human language including semantics (Berwick et al., 2011; Gibson and Tallerman, 2012; Miyagawa  
51 et al., 2013) and provide a new piece of evidence for the hypothesis that human language modules, such as syntax  
52 and semantics, evolved from different precursors that are shared with other animals (e.g., birdsongs and alarm calls  
53 respectively; Okanoya, 2007; Okanoya and Merker, 2007; Miyagawa et al., 2013, 2014; Nóbrega and Miyagawa, 2015).

## 54 Results

### 55 *Unsupervised, individual-invariant classification of song syllables*

56 The context dependency analysis requires discrete representations, or “labels”, of song syllables. Recent studies have  
57 explored fully unsupervised classification of animal vocalization based on acoustic features extracted by an artificial  
58 neural network, called variational autoencoder or VAE (Kingma and Welling, 2014; Coffey et al., 2019; Goffinet et al.,  
59 2019; Sainburg et al., 2019b). We extended this approach and newly proposed an end-to-end unsupervised clustering  
60 method named ABCD-VAE, which utilizes the attention-based categorical sampling with the Dirichlet prior. This  
61 method automatically classifies syllables into an unspecified number of statistically optimal categories. It also allowed  
62 us to exploit the speaker-normalization technique developed for unsupervised learning of human language from speech  
63 recordings (van den Oord et al., 2017; Chorowski et al., 2019; Dunbar et al., 2019; Tjandra et al., 2019), yielding  
64 syllable classification modulo individual variation.

65 We used a dataset of Bengalese finches’ songs that was originally recorded for previous studies. Song syllables in the  
66 recorded waveform data were detected and segmented by amplitude thresholding. We collected 465,310 syllables in  
67 total from 18 adult male birds, and fed them to the unsupervised classifier (Fig. 1A). The classifier consisted of two  
68 concatenated recurrent neural networks (RNNs, see Fig. 1B). We jointly trained the entire network such that the first

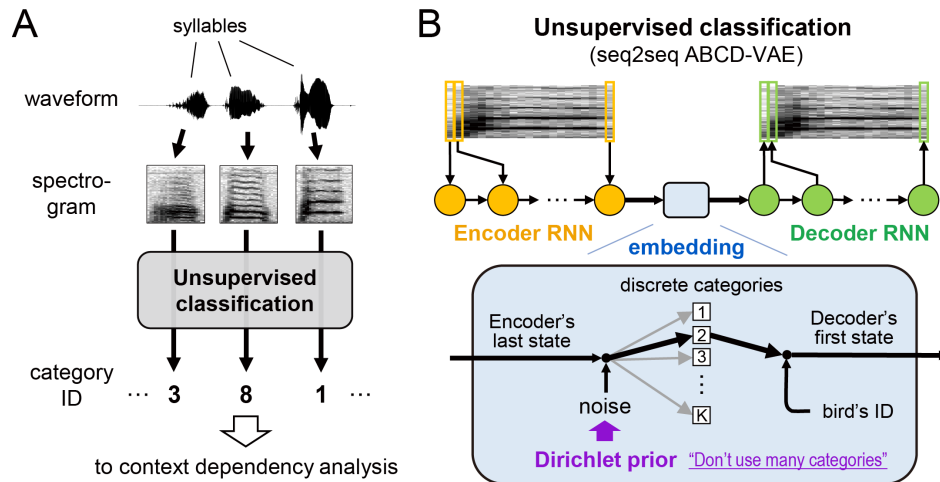

**Figure 1.** Schematic diagram of newly proposed syllable classification. (A) Each sound waveform segment was converted into the time-frequency representations (spectrograms), and was assigned to one of syllable categories by the unsupervised classification. (B) The unsupervised classification was implemented as a sequence-to-sequence version of the variational autoencoder, consisting of the attention-based categorical sampling with the Dirichlet prior (“seq2seq ABCD-VAE”). The ABCD-VAE encoded syllables into discrete categories between the encoder and the decoder. A statistically optimal number of categories was detected under an arbitrarily specified upper bound thanks to the Dirichlet prior. The identity of the syllable-uttering individual was informed to the decoder besides the syllable categories; Accordingly, individual-specific patterns need not have been encoded in the discrete syllable representation.

69 RNN represented the entirety of each input syllable in its internal state (“encoding” Fig. 1B) and the second RNN  
70 restored the original syllable from the internal representation as precisely as possible (“decoding”). The encoded  
71 representation of the syllable was mapped to a categorical space (“embedding”) before the decoding process. The  
72 number of syllable categories was automatically detected as a statistical optimum owing to the Dirichlet prior (Bishop,  
73 2006; O’Donnell, 2015; Little, 2019).

74 As a result, the classifier detected 39 syllable categories in total for all the birds (Fig. 2). Syllables that exhibit similar  
75 acoustic patterns tended to be classified into the same category across different birds (Fig. 2A). Almost all birds produced  
76 not all but a part of syllable categories in their songs (Fig. 2B). The syllable repertoire of each bird covered 26 to 38  
77 categories ( $34.78 \pm 3.19$ ). Conversely, each category consisted of syllables produced by 8 to 18 birds ( $16.05 \pm 2.52$ ).  
78 The detected categories appeared to align with major differences in the spectrotemporal pattern (Fig. 2C).

## 79 *Quantitative evaluation of syllable classification*

80 We assessed the reliability of the detected classification by its alignment with manual annotations by a human expert  
81 (see Tachibana et al., 2014). We scored the alignment using two metrics. One was Cohen’s Kappa coefficient (Cohen,  
82 1960), which has been used to evaluate syllable classifications in previous studies (Katahira et al., 2011; Tachibana  
83 et al., 2014). A problem with this metric is that it requires two classifications to use the same set of categories while  
84 our model predictions and human annotations had different numbers of categories and, thus, we needed to force-align  
85 each of the model-predicted categories to the most common human-annotated label to use the metric. To get rid of the  
86 force-alignment and any other post-processing, we also evaluated the classification using a more recently developed  
87 metric called V-measure (Roseberg and Hirschberg, 2007). The two evaluation metrics showed that the unsupervised  
88 classification was mostly consistent with manual annotations assigned by a human expert (Table 1; see also Fig 2D);  
89 Even the lowest Kappa coefficient reached the level of “almost perfect agreement” (Landis and Koch, 1977) and the  
90 lowest V-measure score among the birds was significantly greater than the chance level ( $p < 0.0001$ ). Hence, our  
91 unsupervised clustering of syllables is as reliable as the manual classification by the expert.

92 To evaluate the individual-invariance of the model-predicted classification, we also measured the identifiability of each  
93 individual bird from the category of a syllable it uttered, fitting the conditional categorical distribution to 90% of the  
94 syllables by the maximum likelihood criterion and then evaluating the prediction accuracy on the other 10%. As a  
95 baseline, we also measured the individual predictability from continuous-valued features of syllables extracted by  
96 the canonical VAE (Kingma and Welling, 2014; Coffey et al., 2019; Goffinet et al., 2019; Sainburg et al., 2019b, see  
97 Method for details). The feature-to-individual classifier for this baseline was implemented by a feed-forward neural

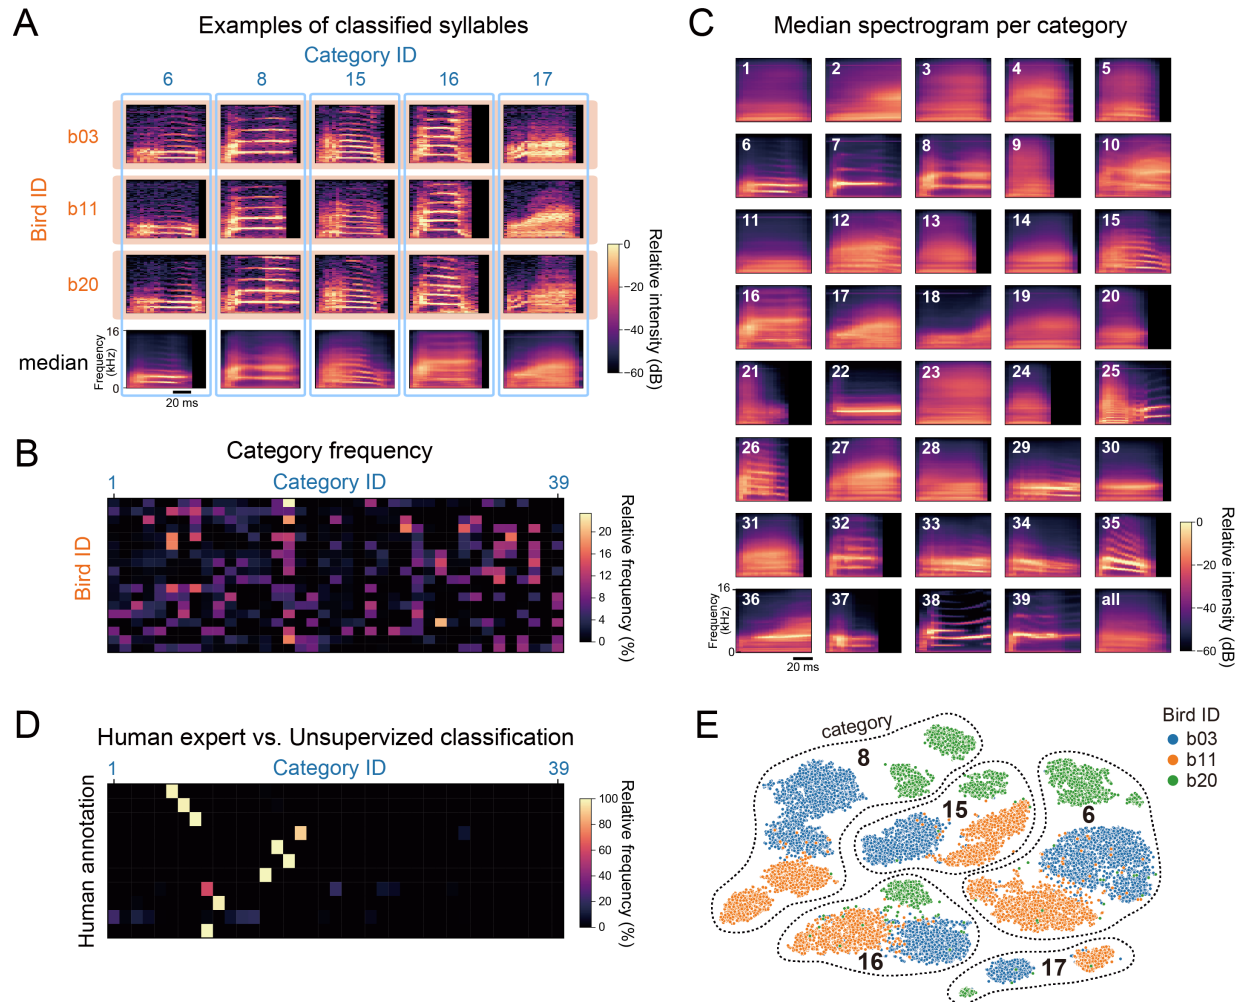

**Figure 2.** Clustering results of Bengalese finch syllables based on the ABCD-VAE. (A) Syllable spectrograms and their classification across individuals. Syllables in each of the first to third rows (yellow box) were sampled from the same individual. Each column (blue frame) corresponds to the syllable categories assigned by the ABCD-VAE. The bottom row provides the median spectrogram of each category over all the 39 individuals. The examples had the greatest classification probability ( $> 0.999$ ) among the syllables of the same individual and category. (B) Relative frequency of syllable categories (columns) per individual (rows). (C) Median spectrogram of each syllable category predicted by the ABCD-VAE. (D) Relative frequency of syllable categories (columns) per label manually annotated by a human expert. Only data from a single individual (b03) were presented because the manual annotations were not shared across individuals. (E) Comparison between syllable embeddings by the canonical continuous-valued VAE with the Gaussian noise (scatter points) and classification by the ABCD-VAE (grouped by the dotted lines). The continuous representation originally had 16 dimensions and was embedded into the 2-dimensional space by t-SNE. The continuous embeddings included notable individual variations represented by colors, whereas the ABCD-VAE classification ignored these individual variations.

**Table 1.** Scores of the clustering by the ABCD-VAE. Cohen’s kappa coefficient and V-measure evaluated the alignment of the clustering by the ABCD-VAE to manual annotations by a human expert. Since the manual annotation was not shared across individuals, we scored each individual separately and report the median, maximum, and minimum over the individuals. Even the minimum V-measure score was statistically significantly greater than the random baseline (obtained from 10,000 samples of shuffled manual annotation) and the minimum kappa coefficient exhibited so-called “almost perfect agreement”. The individual predictability scored the amount of individuality included in the syllable categories yielded by the ABCD-VAE. The score was defined by the accuracy of predictions of the individual uttering a test syllable (10% of the entire data) based on the greatest probability assigned by a classifier fitted to the other 90% of the syllables by the maximum likelihood optimization. The individual predictability from the ABCD-VAE categories was notably smaller than that from the continuous representation obtained via the canonical VAE (the embedding-to-individual classifier was implemented by a feed-forward neural network with a single hidden layer), evidencing the individual-invariance of the ABCD-VAE categories.

| Metric                                  |                         | Score  | Note                              |
|-----------------------------------------|-------------------------|--------|-----------------------------------|
| Cohen’s kappa<br>(vs. human annotation) | Median                  | 0.9376 |                                   |
|                                         | Max                     | 0.9929 |                                   |
|                                         | Min                     | 0.8101 | “Almost perfect agreement”        |
| V-measure<br>(vs. human annotation)     | Median over individuals | 0.7985 |                                   |
|                                         | Max                     | 0.8879 |                                   |
|                                         | Min                     | 0.6527 | $p < 0.0001$                      |
| Individual predictability               |                         | 0.2670 | $\ll 0.8662$ of the canonical VAE |

98 network with a single hidden layer. The individual predictability from the discrete syllable categories was notably  
99 smaller than that from the continuous-valued features (Table 1). Thus, the proposed clustering is considered to have  
100 ignored individual variations (and other minor differences) visible in the syllable embeddings obtained via the canonical  
101 continuous-valued VAE (see also Fig. 2E).

## 102 *Birdsong sequence more context-dependent than English syntax*

103 The classification described above provided us sequences of categorically represented syllables. To assess the context  
104 dependency in the sequence, we then measured differences between syllables predicted from full-length contexts and  
105 truncated contexts. This difference become large as the length of the truncated context gets shorter and contains less  
106 information. And, the difference should increase if the original sequence has a longer context dependency (Fig. 3A).  
107 Thus, the context dependency can be quantified as the maximum length of the truncated contexts where the difference is  
108 statistically detectable (Khandelwal et al., 2018; Dai et al., 2019). For the context-dependent prediction, we employed  
109 the Transformer language model (Vaswani et al., 2017; Devlin et al., 2018; Dai et al., 2019).

110 Each sequence included syllables that form a continuous song performance, or “bout”. We obtained a total of 9,139  
111 bouts, and used 9,039 of them to train the Transformer. The remaining 100 bouts were used to score its predictive  
112 performance from which the dependency was calculated. The model predictions were provided of the log conditional  
113 probability of the test syllables ( $x$ ) given the preceding ones in the same bout. We compared the model predictions  
114 between the full-context (“Full”, Fig. 3A) and the truncated-context (“Truncated”) conditions. Then, the context  
115 dependency was quantified by a statistical measure of the effective context length (Khandelwal et al., 2018; Dai et al.,  
116 2019), which is the maximum length of the truncated context wherein the mean prediction difference between the two  
117 contexts was significantly greater than the canonical 1% threshold in perplexity (at 0.05 level of significance estimated  
118 from 10,000 bootstrapped samples; Khalighinejad et al., 2017). For comparison, we performed the same analysis on  
119 English sentence datasets (12,327 training sentences and 2,006 test sentences; Silveira et al., 2014) in two different  
120 forms. One of them represented the words by their lemma (i.e., original word forms without grammatical inflection;  
121 e.g., ‘fixed’ was represented as ‘fix’). The other form contained only the grammatical information by replacing words  
122 with the part-of-speech (PoS) tags such as nouns and verbs (Perfors et al., 2011a). This process made the analyzed  
123 context dependencies free of semantic factors such as co-occurrences of topic-specific words at distance (e.g., ‘salt’ and  
124 ‘sugar’ co-occur in cooking recipes irrespective of a grammatical relation).

125 The statistically effective context length (SECL) of the Bengalese finch song was eight (pink line in Fig. 3B). In other  
126 words, restricting available contexts to eight or less preceding syllables significantly decreased the prediction accuracy  
127 comparing with the full-context baseline, while the difference became marginal when nine or more syllables were  
128 included in the truncated context. This number is lower than the SECL of the English sentence data, which was ten or

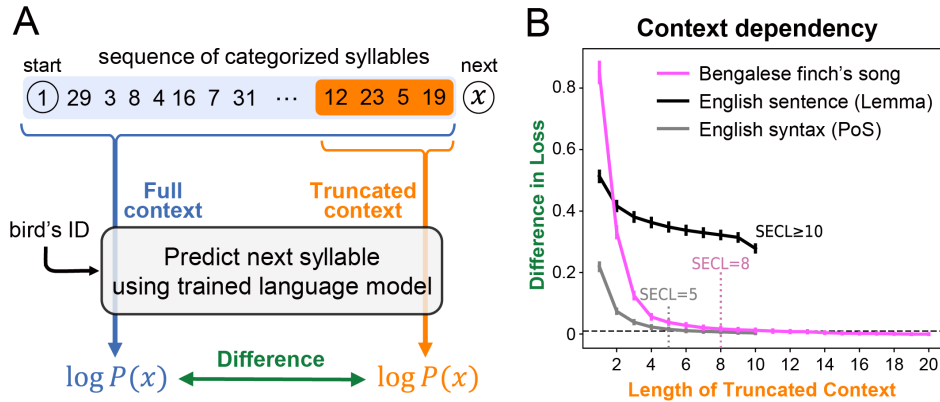

129 greater (black line, achieved the upper bound). On the other hand, the SECL in English decreased to five when we  
130 replaced words with the PoS tags and removed the semantic factors (gray line). Hence, the context dependency in  
131 Bengalese finch songs is more comparable to that in the English syntax than in the full English including semantics.

129 greater (black line, achieved the upper bound). On the other hand, the SECL in English decreased to five when we  
130 replaced words with the PoS tags and removed the semantic factors (gray line). Hence, the context dependency in  
131 Bengalese finch songs is more comparable to that in the English syntax than in the full English including semantics.

## 132 Discussion

133 This study assessed the context dependency in Bengalese finch's song to investigate how long individual birds must  
134 remember their previous vocal outputs to generate well-formed song bouts. We addressed this question by fitting a  
135 state-of-the-art language model, Transformer, to the bouts, and evaluating the decline in the model's performance  
136 upon truncation of the context. We also proposed an end-to-end clustering method of Bengalese finch syllables, the  
137 ABCD-VAE, to obtain discrete inputs for the language model. In the section below, we discuss the results of this  
138 syllable clustering and then move to consider context dependency.

### 139 Clustering of syllables

140 The clustering of syllables into discrete categories played an essential role in our analysis of context dependency in  
141 Bengalese finch songs, particularly for the comparison to human language in text. Various studies have observed how  
142 fundamental the classification of voice elements is to animal vocalization (Payne and McVay, 1971; Seyfarth et al.,  
143 1980; Hosino and Okanoya, 2000; Kojima, 2003; Suzuki et al., 2006; Kakishita et al., 2007; Markowitz et al., 2013;  
144 Kershenbaum et al., 2016; Sainburg et al., 2019a, but see Katahira et al., 2011; Morita and Koda, 2019; Sainburg et al.,  
145 2019b for categorization-free approaches).

146 Our syllable clustering is based on the AVCD-VAE and features the following advantages over previous approaches. First,  
147 the ABCD-VAE works in a completely unsupervised fashion. The system finds the statistically optimal classification  
148 of syllables instead of generalizing manual labeling of syllables by human annotators (as opposed to Tachibana et al.,  
149 2014). Thus, the obtained results are more objective and reproducible (cf. Janik, 1999). Second, the ABCD-VAE detects  
150 the statistically optimal number of syllable categories rather than pushing syllables into a pre-specified number of  
151 classes (as opposed to Jang et al., 2017; van den Oord et al., 2017; Chorowski et al., 2019). This update is of particular  
152 importance when we know little about the ground truth classification—as in the cases of animal song studies—and need  
153 a more non-parametric analysis. Third, the ABCD-VAE adopted the speaker-normalization technique used for human  
154 speech analysis and finds individual-invariant categories of syllables (van den Oord et al., 2017; Chorowski et al., 2019;  
155 Tjandra et al., 2019). Finally, the end-to-end clustering by the ABCD-VAE is more optimal than the previous two-step  
156 approach—acoustic feature extraction followed by clustering—because the feature extractors are not optimized for

157 clustering and the clustering algorithms are often blind to the optimization objective of the feature extractors (Coffey  
158 et al., 2019; Goffinet et al., 2019; Sainburg et al., 2019b). Chorowski et al. (2019) also showed that a similar end-to-end  
159 clustering is better at finding speaker-invariant categories in human speech than the two-step approach.

160 It should be noted that the classical manual classification of animal voice was often based on *visual* inspection on  
161 the waveforms and/or spectrograms rather than auditory inspection (Payne and McVay, 1971; Katahira et al., 2011;  
162 Tachibana et al., 2014). Similarly, previous VAE analyses of animal voice often used a convolutional neural network  
163 that processed spectrograms as images of a fixed size (Coffey et al., 2019; Goffinet et al., 2019). By contrast, the present  
164 study adopted a RNN (specifically, a version called the long short-term memory, abbreviated as LSTM Hochreiter  
165 and Schmidhuber, 1997) to process syllable spectra frame by frame as time series data. Owing to the lack of ground  
166 truth as well as empirical limitations on experimental validation, it is difficult to adjudicate on the best neural network  
167 architecture for auto-encoding Bengalese finch syllables and other animals' voice. Nevertheless, RNN deserves close  
168 attention as a neural/cognitive model of vocal learning. There is a version of RNN called *reservoir computer* that has  
169 been developed to model computations in cortical microcircuits (Maass et al., 2002; Natschläger et al., 2003; Jaeger  
170 and Haas, 2004). Future studies may replace the LSTM in the ABCD-VAE with a reservoir computer to build a more  
171 biologically plausible model of vocal learning (cf. Dehaene et al., 1987). Similarly, we may filter some frequency  
172 bands in the input sound spectra to simulate the auditory perception of the target animal (cf. the Mel-frequency cepstral  
173 coefficients, MFCCs, are used in human speech analysis; Chung et al., 2016; Chorowski et al., 2019; Tjandra et al.,  
174 2019), and/or adopt more anatomically/bio-acoustically realistic articulatory systems for the decoder module (cf. Wang  
175 et al., 2020, implemented the source-filter model of vocalization based on an artificial neural network). Such Embodied  
176 VAEs would allow constructive investigation of vocal learning beyond mere acoustic analysis.

177 A visual inspection of classification results shows that the ABCD-VAE can discover individual-invariant categories of  
178 the Bengalese finch syllables (Figure 2). This speaker-normalization effect is remarkable because the syllables exhibit  
179 notable individual variations in the continuous feature space mapped into by the canonical VAE and cross-individual  
180 clustering is difficult there (see Figure 2E and the supporting information S1.4; Coffey et al., 2019; Goffinet et al.,  
181 2019; Sainburg et al., 2019b). Previous studies on Bengalese finch and other songbirds often assigned distinct sets of  
182 categories to syllables of different individuals, presumably because of similar individual variations in the feature space  
183 they adopted (Katahira et al., 2011; Markowitz et al., 2013; Tachibana et al., 2014; Kershenbaum et al., 2016; Sainburg  
184 et al., 2019b).

185 The end-to-end classification by the ABCD-VAE can be applied to a broad range of studies on animal vocalization,  
186 including cases where sequential organization of voice units is not at issue. The limitations of the proposed method  
187 are the prerequisite for appropriate voice segmentation as it operates on predefined time series of sound spectra, and a  
188 single category is assigned to each time series. Although birdsongs often exhibit clear pauses and researchers use them  
189 to define syllable boundaries, appropriate voice segmentation is not necessarily clear for other animals (Kershenbaum  
190 et al., 2016; Sainburg et al., 2019b), including human speech (Chiu et al., 2017; Dunbar et al., 2017, 2019; Rao et al.,  
191 2017). A possible solution to this problem (in accordance with our end-to-end clustering) is to categorize sounds  
192 frame by frame (e.g., by spectrum and MFCC) and merge contiguous classmate frames to define a syllable-like span  
193 (Chorowski et al., 2019; Tjandra et al., 2019).

## 194 ***Context dependency***

195 According to our analysis of context dependency, Bengalese finches are expected to keep track of up to eight previously  
196 uttered syllables—not just one or two—during their singing. This is evidenced by the relatively poor performance of the  
197 song simulator conditioned on the truncated context of one to eight syllables compared to the full-context condition. Our  
198 findings add a new piece of evidence for long context dependency in Bengalese finch songs found in previous studies.  
199 Katahira et al. (2011) showed that there are at least two dependent context lengths. They compared the first order and  
200 second order Markov models, which can only access the one and two preceding syllable(s), respectively, and found  
201 significant differences between them. A similar analysis was performed on canary songs by Markowitz et al. (2013),  
202 with an extended Markovian order (up to seventh). The framework in these studies cannot scale up to assess longer  
203 context dependency owing to the empirical difficulty of training higher-order Markov models (Katz, 1987; Kneser and  
204 Ney, 1995; Bengio et al., 2001, 2003; Goldwater et al., 2006; Teh, 2006). By contrast, the present study exploited  
205 a state-of-the-art neural language model (Transformer) that can effectively combine information from much longer  
206 contexts than previous Markovian models and potentially refer up to 900 tokens (Dai et al., 2019). Thus, the dependency  
207 length reported in this study is not likely to be upper-bounded by the model limitations and provides a more precise  
208 estimation of the real dependency length in a birdsong than previous studies. The long context dependency in Bengalese  
209 finch songs is also evidenced by experimental studies. Warren et al. (2012) reported that several pairs of syllable  
210 categories had different transitional probability depending on whether or not the same transition pattern occurred in the  
211 previous opportunity. In other words,  $\mathbb{P}(B | AB \dots A \_ ) \neq \mathbb{P}(B | AC \dots A \_ )$  where  $A, B, C$  are distinct syllable

212 categories, the dots represent intervening syllables of an arbitrary length ( $\neq A$ ), and the underline indicates the position  
213 of  $B$  whose probability is measured. They also found that the probability of such history-dependent transition patterns  
214 is harder to modify through reinforcement learning than that of more locally dependent transitions. These results are  
215 consistent with our findings. It often takes more than two transitions for syllables to recur (12.17 syllables on average  
216 with the SD of 11.30 according to our own bout data, excluding consecutive repetitions); therefore, the dependency on  
217 the previous occurrence cannot be captured by memorizing just one or two previously uttered syllable(s).

218 Our study also found that Bengalese finch songs are more comparable to human language syntax than to the entirety  
219 of human language including semantics. This was demonstrated by our analysis of English sentences represented  
220 by sequences of lemmas and PoS categories. While the lemma-represented English sentences exhibited long context  
221 dependency beyond ten words as reported in previous studies (Khandelwal et al., 2018; Dai et al., 2019), the dependency  
222 length decreased to five—below the Bengalese finch result—when the PoS representation was used and semantic  
223 information was removed from the sentences. The gap between the two versions of English suggests that the major  
224 factor of long-distance dependencies in human language is the semantics, not the syntax. This is consistent with previous  
225 studies reporting that human language syntax prefers shorter dependency (Gibson, 1998; Futrell et al., 2015). Moreover,  
226 comparative studies between birdsong and human language often argue the former's lack of semantic function (Berwick  
227 et al., 2011, 2012; Gibson and Tallerman, 2012; Miyagawa et al., 2013, 2014), without referential variations seen in  
228 alarm calls (Seyfarth et al., 1980; Ouattara et al., 2009; Suzuki et al., 2016). This claim led to the hypothesis that human  
229 language syntax and semantics evolved from different precursors—sequence-generating system, such as animal song,  
230 and information-carrying system such as alarm calls—which were integrated to shape the entirety of human language  
231 (Okanoya, 2007; Okanoya and Merker, 2007; Miyagawa et al., 2013, 2014; Nóbrega and Miyagawa, 2015). Our findings  
232 are in accordance with this view, providing a novel relative similarity between birdsong and human language syntax  
233 compared to the whole linguistic system. Note that this kind of direct comparative study of human language and animal  
234 song was not feasible until flexible language models based on neural networks became available.

235 The reported context dependency on eight previous syllables also has an implication for possible models of Bengalese  
236 finch syntax. Feasible models should be able to represent the long context efficiently. For example, the simplest and  
237 traditional model of the birdsong and voice sequences of other animals—including human language before the deep  
238 learning era—is the  $n$ -gram model, which exhaustively represents all the possible contexts of length  $n - 1$  as distinct  
239 conditions (Katz, 1987; Kneser and Ney, 1995; Hosino and Okanoya, 2000; Goldwater et al., 2006; Teh, 2006). This  
240 approach, however, requires an exponential number of contexts to be represented in the model. In the worst case, the  
241 number of possible contexts is  $39^8 = 5,352,009,260,481$  when there are 39 syllable types and the context length is  
242 eight as detected in this study. Such an exhaustive representation is not only hard to store and learn—for both real  
243 birds and simulators—but also uninterpretable to researchers. Thus, a more efficient representation of the context  
244 syllables is required (cf. Morita and Koda, 2020). Katahira et al. (2011) assert that the song syntax of the Bengalese  
245 finch can be better described with a lower-order hidden Markov model (Rabiner, 1989; Beal et al., 2002, HMM;  
246 than the  $n$ -gram model. Moreover, hierarchical language models used in computational linguistics (e.g., probabilistic  
247 context-free grammar) are known to allow a more compact description of human language (Perfors et al., 2011b) and  
248 animal voice sequences (Morita and Koda, 2019) than sequential models like HMM. Another compression possibility is  
249 to represent consecutive repetitions of the same syllable categories differently from transitions between heterogeneous  
250 syllables (cf. Kershenbaum et al., 2014). This idea is essentially equivalent to the run length encoding of digital signals  
251 (e.g., AAABBCDDEEEEEE can be represented as 3A2B1C2D5E where the numbers count the repetitions of the following  
252 letter) and is effective for data including many repetitions like Bengalese finch's song. For the actual implementation in  
253 birds' brains, the long contexts can be represented in a distributed way (Nishikawa et al., 2008): Activation patterns of  
254 neuronal ensemble can encode a larger amount of information than the simple sum of information representable by  
255 individual neurons, as demonstrated by the achievements of artificial neural networks (Bengio et al., 2001, 2003; Ryeu  
256 et al., 2001; Tsuda, 2001; Maass et al., 2002; Jaeger and Haas, 2004; Nishikawa and Okanoya, 2006).

257 While this study discussed context dependency in the context of memory durability required for generating/processing  
258 birdsongs (cf. Katahira et al., 2011; Warren et al., 2012; Markowitz et al., 2013), there are different definitions of  
259 context dependency designed for different research purposes. Sainburg et al. (2019a) studied the *mutual information*  
260 between birdsong syllables—including Bengalese finch ones—appearing at each discrete distance. Following a study  
261 on human language by Lin and Tegmark (2017), Sainburg et al. analyzed patterns in the decay of mutual information to  
262 diagnose the generative model behind the birdsong data, instead of addressing the question about memory. Importantly,  
263 their mutual information analysis cannot replace our model-based analysis to assess the memory-oriented context  
264 dependency: Mutual information is a pairwise metric of probabilistic dependence between two tokens (e.g., words in  
265 human languages, syllables in birdsongs), and thus, everything in the middle is ignored. To see the problem, suppose  
266 that some tokens reflect the individuality of the speaker (see Figure S3.1a in the supporting information; section S3.1  
267 also provides a more concrete, mathematical example of this problematic situation, and S3.2 introduces other examples  
268 that demonstrate difficulties in the mutual information analysis). Two occurrences of speaker-encoding tokens are



269 dependent on each other regardless of their distance if the other tokens between the two are ignored, and this pairwise  
270 dependence is what mutual information accounts for. It should be clear now that such pairwise dependence does not  
271 necessarily match the agent-oriented concept of context dependency as the only thing relevant to the song recognition  
272 task (or speaker identification in this toy example) is the most recent occurrence of the correlating tokens. By contrast,  
273 our language modeling approach captured the agent-oriented concept of context dependency as desired. Dependency  
274 on a token in the past is detected if the prediction of upcoming tokens becomes notably more difficult by limiting the  
275 available context to the more recent tokens (Figure S3.1b; Khandelwal et al., 2018; Dai et al., 2019). In other words,  
276 reference to a token in the distant past is considered unnecessary if the same information (e.g., speaker identity) is  
277 available from more recent tokens. Therefore, the present study complements, rather than repeats/replaces, the mutual  
278 information analysis and findings from it.

279 We conclude the present paper by noting that the analysis of context dependency via neural language modeling is  
280 not limited to Bengalese finch's song. Since neural networks are universal approximators and potentially fit to any  
281 kind of data (Cybenko, 1989; Hornik, 1991; Jin et al., 1995; Maass et al., 2002; Lu et al., 2017), the same analytical  
282 method is applicable to other animals' voice sequences (Payne and McVay, 1971; Suzuki et al., 2006; Markowitz et al.,  
283 2013; Morita and Koda, 2019). Moreover, the analysis of context dependency can also be performed in principle on  
284 other sequential behavioral data besides vocalization, including dance (Frith and Beehler, 1998; Scholes, 2006, 2008)  
285 and gestures (van Lawick-Goodall, 1968; de Waal, 1988; Tanner and Byrne, 1996; Liebal et al., 2006). Hence, our  
286 method provides a crossmodal research paradigm for inquiry into the effect of past behavioral records on future decision  
287 making.

## 288 **Materials & Methods**

### 289 *Recording and segmentation of Bengalese finch's song*

290 We used the same recordings of Bengalese finch songs that were originally reported in our earlier studies Tachibana  
291 et al. (2014, 2015). The data were collected from 18 adult males (>140 days after hatching), each isolated in a birdcage  
292 placed inside a soundproof chamber. The microphone (Audio-Technica PRO35) was installed above the birdcages. The  
293 output of the microphone was amplified using a mixer (Mackie 402-VLZ3) and digitized through an audio interface  
294 (Roland UA-1010/UA-55) at 16-bits with a sampling rate of 44.1 kHz. The recordings were then down-sampled to  
295 32 kHz (see Tachibana et al. (2014, 2015) for more information about the recording).

296 Song syllables were segmented from the continuous recordings using the thresholding algorithm proposed in the  
297 previous studies (Tachibana et al., 2014, 2015). We defined a sequence of the syllables as a bout if every two adjacent  
298 syllables in the sequence were spaced at most 500 msec apart. These segmentation processes yielded 465,310 syllables  
299 and 9,139 bouts in total ( $\approx 10.79$  hours).

### 300 *Clustering of syllables*

301 To perform an analysis parallel to the discrete human language data, we classified the segmented syllables into discrete  
302 categories in an unsupervised way. Specifically, we used an end-to-end clustering method, named the seq2seq ABCD-  
303 VAE, that combined (i) neural network-based extraction of syllable features and (ii) Bayesian classification, both of  
304 which worked in an unsupervised way (i.e., without top-down selection of acoustic features or manual classification  
305 of the syllables). This section provides an overview of our method, with a brief, high-level introduction to the two  
306 components. Interested readers are referred to S1 in the supporting information, where we provide more detailed  
307 information. One of the challenges to clustering syllables is their variable duration as many of the existing clustering  
308 methods require their input to be a fixed-dimensional vector. Thus, it is convenient to represent the syllables in such  
309 a format (but see Bellman and Kalaba, 1959; Levenshtein, 1966; Morita and O'Donnell, To appear, for alternative  
310 approaches). Previous studies on animal vocalization often used acoustic features like syllable duration, mean pitch,  
311 spectral entropy/shape (centroid, skewness, etc.), mean spectrum/cepstrum, and/or Mel-frequency cepstral coefficients  
312 at some representative points for the fixed-dimensional representation (Katahira et al., 2011; Tachibana et al., 2014;  
313 Mielke and Zuberbühler, 2013; Morita and Koda, 2019). In this study, we took a non-parametric approach based on a  
314 sequence-to-sequence (seq2seq) autoencoder (Bowman et al., 2016; Chung et al., 2016; Zhao et al., 2017; Sainburg  
315 et al., 2019b). The seq2seq autoencoder is a RNN that first reads the whole spectral sequence of an input syllable frame  
316 by frame (*encoding*; the spectral sequence was obtained by the short-term Fourier transform with the 8 msec Hanning  
317 window and 4 msec stride), and then reconstructs the input spectra (*decoding*; see the schematic diagram of the system  
318 provided in the upper half of Figure 1B). Improving the precision of this reconstruction is the training objective of  
319 the seq2seq autoencoder. For successful reconstruction, the RNN must store the information about the entire syllable

320 in its internal state—represented by a fixed-dimensional vector—when it transitions from the encoding phase to the  
321 decoding phase. And this internal state of the RNN served as the fixed-dimensional representation of the syllables.  
322 We implemented the encoder and decoder RNNs by the LSTM (Hochreiter and Schmidhuber, 1997, the encoder was  
323 bidirectional; Schuster and Paliwal, 1997).

324 One problem with the auto-encoded features of the syllables is that the encoder does not guarantee their interpretability.  
325 The only thing the encoder is required to do is push the information of the entire syllables into fixed-dimensional vectors,  
326 and the RNN decoder is so flexible that it can map two neighboring points in the feature space to completely different  
327 sounds. A widely adopted solution to this problem is to introduce Gaussian noise to the features, turning the network  
328 into the *variational* autoencoder (VAE; Kingma and Welling, 2014; Bowman et al., 2016; Zhao et al., 2017, see also  
329 Coffey et al., 2019; Goffinet et al., 2019; Sainburg et al., 2019b for its applications to animal vocalization). Abstracting  
330 away from the mathematical details, the Gaussian noise prevents the encoder from representing two dissimilar syllables  
331 close to each other. Otherwise, the noisy representation of the two syllables will overlap and the decoder cannot  
332 reconstruct appropriate sounds for each.

333 The Gaussian VAE represents the syllables as real-valued vectors of an arbitrary dimension, and researchers need to  
334 apply a clustering method to these vectors in order to obtain discrete categories. This two-step analysis has several  
335 problems:

- 336 i The VAE is not trained for the sake of clustering, and the entire distribution of the encoded features may not  
337 be friendly to existing clustering methods.
- 338 ii The encoded features often include individual differences and do not exhibit inter-individually clusterable  
339 distribution (see Figure 2E and the supporting information S1.4).

340 To solve these problems, this study adopted the ABCD-VAE, which encoded data into discrete categories with a  
341 categorical noise under the Dirichlet prior, and performed end-to-end clustering of syllables within the VAE (Figure 1B).  
342 The ABCD-VAE married discrete autoencoding techniques (Jang et al., 2017; van den Oord et al., 2017; Chorowski  
343 et al., 2019) and the Bayesian clustering popular in computational linguistics and cognitive science (e.g., Anderson,  
344 1990; Kurihara and Sato, 2004, 2006; Teh et al., 2006; Kemp et al., 2007; Goldwater et al., 2009; Feldman et al., 2013;  
345 Kamper et al., 2017; Morita and O'Donnell, To appear). It has the following advantages over the Gaussian VAE +  
346 independent clustering (whose indices, except iii, correspond to the problems with the Gaussian VAE listed above):

- 347 i Unlike the Gaussian VAE, the ABCD-VAE is optimized for clustering, aiming at optimal discrete encoding of  
348 the syllables.
- 349 ii The ABCD-VAE can exploit a speaker-normalization technique that has proven effective for discrete VAEs:  
350 The “Speaker Info.” is fed directly to the decoder (Figure 1B), and thus individual-specific patterns need not  
351 be encoded in the discrete features (van den Oord et al., 2017; Chorowski et al., 2019; Tjandra et al., 2019, this  
352 is also the framework adopted in the ZeroSpeech 2019, a competition on unsupervised learning of spoken  
353 human languages; Dunbar et al., 2019).
- 354 iii Thanks to the Dirichlet prior, the ABCD-VAE can detect the optimal number of categories on its own (under  
355 an arbitrarily specified upper bound; Bishop, 2006; O'Donnell, 2015; Little, 2019). This is the major update  
356 from the previous discrete VAEs that eat up all the categories available (Jang et al., 2017; van den Oord et al.,  
357 2017; Chorowski et al., 2019).

358 Note that the ABCD-VAE can still measure the similarity/distance between two syllables by the cosine similarity of  
359 their latent representation immediately before the computation of the classification probability (i.e., logits; cf. Mikolov  
360 et al., 2013; Deng et al., 2018).

361 The original category indices assigned by the ABCD-VAE were arbitrarily picked up from 128 possible integers and  
362 not contiguous. Accordingly, the category indices reported in this paper were renumbered for better visualization.

### 363 *Evaluation metrics of syllable clustering*

364 The syllable classification yielded by the ABCD-VAE was evaluated by its alignment with manual annotation by a  
365 human expert. We used two metrics to score the alignment: Cohen's Kappa coefficient (Cohen, 1960) and V-measure  
366 (Roseberg and Hirschberg, 2007). Cohen's Kappa coefficient is a normalized index for the agreement rate between  
367 two classifications, and has been used to evaluate syllable classifications in previous studies (Katahira et al., 2011;  
368 Tachibana et al., 2014). One drawback of using this metric is that it only works when the two classifications use the  
369 same set of categories. This requirement was not met in our case, as the model predicted classification and human  
370 annotation had different numbers of categories, and we needed to force-align each of the model-predicted categories

**Table 2.** The size of the training and test data used in the neural language modeling of Bengalese finch songs and the English language. The “SECL” portion of the test syllables was used to estimate the SECL.

| Data type       | Usage    | # of bouts/sentences | # of syllables/words |       |
|-----------------|----------|----------------------|----------------------|-------|
|                 |          |                      | Total                | SECL  |
| Bengalese finch | Training | 9,039                | 458,753              | —     |
|                 | Test     | 100                  | 6,557                | 4,657 |
| English         | Training | 12,327               | 179,456              | —     |
|                 | Test     | 2,006                | 21,759               | 8,833 |

371 to the most common human-annotated label to compute Cohen’s Kappa (following Katahira et al., 2011). On the  
372 other hand, the second metric, V-measure, can score alignment between any pair of classifications, even with different  
373 numbers of categories. V-measure is defined based on two desiderata: (i) Each of the predicted clusters should only  
374 contain members of a single ground truth class (homogeneity); (ii) The members of each ground truth class should be  
375 clustered into the same category (completeness). The two metrics are defined on a scale of 0 (worst) to 1 (best), and  
376 their harmonic mean yields the V-measure.

### 377 *Language modeling*

378 After the clustering of the syllables, each bout,  $\mathbf{x} := (x_1, \dots, x_T)$ , was represented as a sequence of discrete symbols,  
379  $x_t$ . We performed the analysis of context dependency on these discrete data.

380 The analysis of context dependency made use of a neural language model based on the current state-of-the-art  
381 architecture, Transformer (Vaswani et al., 2017; Al-Rfou et al., 2018; Dai et al., 2019). We trained the language model  
382 on 9,039 bouts, containing 458,753 syllables (Table 2). These training data were defined by the complement of the 100  
383 test bouts that were selected in the following way so that they were long enough (i) and at least one bout per individual  
384 singer was included (ii):

- 385 i The bouts containing 20 or more syllables were selected as the candidates.
- 386 ii For each of the 18 finches, one bout was uniformly randomly sampled among those uttered by that finch.
- 387 iii The other 82 bouts were uniformly randomly sampled from the remaining candidates.

388 The training objective was to estimate the probability of the whole bouts  $\mathbf{x}$  conditioned on the information about the  
389 individual  $s$  uttering  $\mathbf{x}$ : That is,  $\mathbb{P}(\mathbf{x} | s)$ . Thanks to the background information  $s$ , the model did not need to infer the  
390 singer on its own. Hence, the estimated context dependency did not comprise the correlation among syllables with  
391 individuality, which would not count as a major factor especially from a generative point of view.

392 The joint probability,  $\mathbb{P}(\mathbf{x} | s)$ , was factorized as  $\mathbb{P}(\mathbf{x} | s) = \prod_{t=1}^T \mathbb{P}(x_t | x_1, \dots, x_{t-1}, s)$ , and, the model took a form  
393 of the left-to-right processor, predicting each syllable  $x_t$  conditioned on the preceding context  $\langle \text{sos} \rangle, x_1, \dots, x_{t-1}$ ,  
394 where  $\langle \text{sos} \rangle$  stands for the special category marking the start of the bout. See the supporting information S2 for details  
395 on the model parameters and training procedure.

### 396 *Measuring context dependencies*

397 After training the language model, we estimated how much of the context  $x_1, \dots, x_{t-1}$  was used effectively for the  
398 model to predict the upcoming syllable  $x_t$  in the test data. Specifically, we wanted to know the longest length  $L$  of the  
399 truncated context  $x_{t-L}, \dots, x_{t-1}$  such that the prediction of  $x_t$  conditioned on the truncated context was worse (with  
400 at least 1% greater perplexity) than the prediction based on the full context (Figure 3A). This context length  $L$  is called  
401 the *effective context length* (ECL) of the trained language model (Khandelwal et al., 2018).

402 One potential problem with the ECL estimation using the Bengalese finch data was that the test data was much smaller  
403 in size than the human language corpora used in the previous study. In other words, the perplexity, from which the ECL  
404 was estimated, was more likely to be affected by sampling error. To obtain a more reliable result, we bootstrapped the  
405 test data (10,000 samples) and used the five percentile of the bootstrapped differences between the truncated and full  
406 context predictions. We call this bootstrapped version of ECL the *statistically effective context length* (SECL).

407 It is more appropriate to estimate the SECL by evaluating the same set of syllables across different lengths of the  
408 truncated contexts. Accordingly, only those that were preceded by 20 or more syllables (including <sos>) in the test  
409 bouts were used for the analysis (4.657 syllables in total, Table 2).

## 410 *English data*

411 For comparison, we also estimated the SECL of the language model trained on English data. The data were constructed  
412 from the Universal Dependencies English Web Treebank (the training and test portions; Silveira et al., 2014). The  
413 database consists of textual English sentences and each word is annotated with the lemma and PoS category. We  
414 constructed two versions of training and test data using these lemma and PoS representations of the words: Words  
415 may exhibit correlation with one another due to their semantics (e.g., same topic) when they are coded as the lemma.  
416 By contrast, the PoS representation of words removes such semantic information, and allowed us to assess the purely  
417 syntactic dependencies among the words (cf. Perfors et al., 2011b). Note that this semantics-free data may serve as a  
418 more appropriate baseline for the study of birdsongs, whose variation is considered not to encode different meanings  
419 (Okanoya, 2007; Okanoya and Merker, 2007; Berwick et al., 2011, 2012; Gibson and Tallerman, 2012; Miyagawa et al.,  
420 2013, 2014) unlike alarm calls (Seyfarth et al., 1980; Ouattara et al., 2009; Suzuki et al., 2016).

421 The words that were preceded by ten or more tokens (including <sos>) in the test data sentences were used to estimate  
422 the SECL. Accordingly, the upper bound on the SECL (=10) was lower than in the analysis of the Bengalese finch data  
423 (=20). The reason for the different settings is that the English sentences were shorter than the Bengalese finch bouts:  
424 The quartiles of the bout lengths were 22, 44, and 68, while those of the sentence lengths were 7, 14, and 22 (where  
425 both the training and test data were included).

## 426 **Acknowledgments**

427 This study was funded by MEXT Grant-in-aid for Scientific Research on Innovative Areas #4903 (Evolinguistic;  
428 JP17H06380), JSPS Grant-in-Aid for Scientific Research C (JP19KT0023), and the JST Core Research for Evolutional  
429 Science and Technology 17941861 (#JPMJCR17A4).

## 430 **References**

- 431 Al-Rfou, R., Choe, D., Constant, N., Guo, M., and Jones, L. (2018). Character-level language modeling with deeper  
432 self-attention.
- 433 Anderson, J. R. (1990). *The adaptive character of thought*. Studies in cognition. L. Erlbaum Associates, Hillsdale, NJ.
- 434 Beal, M. J., Ghahramani, Z., and Rasmussen, C. E. (2002). The infinite hidden Markov model. In Dietterich, T. G.,  
435 Becker, S., and Ghahramani, Z., editors, *Advances in Neural Information Processing Systems 14*, pages 577–584.  
436 MIT Press.
- 437 Bellman, R. and Kalaba, R. (1959). On adaptive control processes. *IRE Transactions on Automatic Control*, 4(2):1–9.
- 438 Bengio, Y., Ducharme, R., and Vincent, P. (2001). A neural probabilistic language model. In Leen, T. K., Dietterich,  
439 T. G., and Tresp, V., editors, *Advances in Neural Information Processing Systems 13*, pages 932–938. MIT Press.
- 440 Bengio, Y., Ducharme, R., Vincent, P., and Janvin, C. (2003). A neural probabilistic language model. *Journal of*  
441 *Machine Learning Research*, 3:1137–1155.
- 442 Berwick, R., Beckers, G., Okanoya, K., and Bolhuis, J. (2012). A bird’s eye view of human language evolution.  
443 *Frontiers in Evolutionary Neuroscience*, 4:5.
- 444 Berwick, R. C. and Chomsky, N. (2016). *Why Only Us: Language and Evolution*. MIT Press.
- 445 Berwick, R. C., Okanoya, K., Beckers, G. J., and Bolhuis, J. J. (2011). Songs to syntax: the linguistics of birdsong.  
446 *Trends in Cognitive Science*, 15(3):113–121.
- 447 Bishop, C. M. (2006). *Pattern recognition and machine learning*. Information science and statistics. Springer, New  
448 York.
- 449 Bowman, S. R., Vilnis, L., Vinyals, O., Dai, A., Jozefowicz, R., and Bengio, S. (2016). Generating sentences from a  
450 continuous space. In *Proceedings of The 20th SIGNLL Conference on Computational Natural Language Learning*.

- 451 Chiu, C.-C., Sainath, T. N., Wu, Y., Prabhavalkar, R., Nguyen, P., Chen, Z., Kannan, A., Weiss, R. J., Rao, K.,  
452 Gonina, E., Jaitly, N., Li, B., Chorowski, J., and Bacchiani, M. (2017). State-of-the-art speech recognition with  
453 sequence-to-sequence models.
- 454 Chomsky, N. (1956). Three models for the description of language. *IRE Transactions on Information Theory*, 2:113 –  
455 124.
- 456 Chomsky, N. (1957). *Syntactic Structures*. Mouton and Co., The Hague.
- 457 Chorowski, J., Weiss, R. J., Bengio, S., and van den Oord, A. (2019). Unsupervised speech representation learning using  
458 wavenet autoencoders. *IEEE/ACM Transactions on Audio, Speech, and Language Processing*, 27(12):2041–2053.
- 459 Chung, Y.-A., Wu, C.-C., Shen, C.-H., yi Lee, H., and Lee, L.-S. (2016). Audio word2vec: Unsupervised learning of  
460 audio segment representations using sequence-to-sequence autoencoder. In *INTERSPEECH*, pages 765–769.
- 461 Coffey, K. R., Marx, R. G., and Neumaier, J. F. (2019). DeepSqueak: a deep learning-based system for detection and  
462 analysis of ultrasonic vocalizations. *Neuropsychopharmacology*, 44(5):859–868.
- 463 Cohen, J. (1960). A coefficient of agreement for nominal scales. *Educational and Psychological Measurement*,  
464 20(1):37–46.
- 465 Cybenko, G. (1989). Approximation by superpositions of a sigmoidal function. *Mathematics of Control, Signals and*  
466 *Systems*, 2(4):303–314.
- 467 Dai, Z., Yang, Z., Yang, Y., Carbonell, J., Le, Q. V., and Salakhutdinov, R. (2019). Transformer-XL: Attentive language  
468 models beyond a fixed-length context.
- 469 de Waal, F. B. (1988). The communicative repertoire of captive bonobos (*Pan Paniscus*), compared to that of  
470 chimpanzees. *Behaviour*, 106(3-4):183–251.
- 471 Dehaene, S., Changeux, J. P., and Nadal, J. P. (1987). Neural networks that learn temporal sequences by selection.  
472 *Proceedings of the National Academy of Sciences*, 84(9):2727–2731.
- 473 Deng, J., Guo, J., Xue, N., and Zafeiriou, S. (2018). Arcface: Additive angular margin loss for deep face recognition.
- 474 Devlin, J., Chang, M.-W., Lee, K., and Toutanova, K. (2018). BERT: Pre-training of deep bidirectional transformers for  
475 language understanding. arXiv:1810.04805.
- 476 Dunbar, E., Algayres, R., Karadayi, J., Bernard, M., Benjumea, J., Cao, X.-N., Miskic, L., Dugrain, C., Ondel, L.,  
477 Black, A. W., Besacier, L., Sakti, S., and Dupoux, E. (2019). The Zero Resource Speech Challenge 2019: TTS  
478 without T. In *Proceedings of Interspeech 2019*, pages 1088–1092.
- 479 Dunbar, E., Cao, X. N., Benjumea, J., Karadayi, J., Bernard, M., Besacier, L., Anguera, X., and Dupoux, E. (2017). The  
480 zero resource speech challenge 2017. In *2017 IEEE Automatic Speech Recognition and Understanding Workshop*  
481 *(ASRU)*, pages 323–330.
- 482 Feldman, N. H., Goldwater, S., Griffiths, T. L., and Morgan, J. L. (2013). A role for the developing lexicon in phonetic  
483 category acquisition. *Psychological Review*, 120(4):751–778.
- 484 Friston, K. (2003). Learning and inference in the brain. *Neural Networks*, 16(9):1325–1352. Neuroinformatics.
- 485 Friston, K. (2010). The free-energy principle: a unified brain theory? *Nature Reviews Neuroscience*, 11:127–138.
- 486 Friston, K. J. and Stephan, K. E. (2007). Free-energy and the brain. *Synthese*, 159(3):417–458.
- 487 Frith, C. B. and Beehler, B. M. (1998). *The Birds of Paradise: Paradisaeidae*. Bird Families of the World. Oxford  
488 University Press, Oxford.
- 489 Futrell, R., Mahowald, K., and Gibson, E. (2015). Large-scale evidence of dependency length minimization in 37  
490 languages. *Proceedings of the National Academy of Sciences*, 112(33):10336–10341.
- 491 Gibson, E. (1998). Linguistic complexity: locality of syntactic dependencies. *Cognition*, 68(1):1–76.
- 492 Gibson, K. R. and Tallerman, M. (2012). *The Oxford Handbook of Language Evolution*. Oxford University Press.
- 493 Goffinet, J., Mooney, R., and Pearson, J. (2019). Inferring low-dimensional latent descriptions of animal vocalizations.  
494 *bioRxiv*.
- 495 Goldwater, S., Griffiths, T. L., and Johnson, M. (2006). Interpolating between types and tokens by estimating power-law  
496 generators. In Weiss, Y., Schölkopf, B., and Platt, J. C., editors, *Advances in Neural Information Processing Systems*  
497 *18*, pages 459–466, Cambridge, MA. MIT Press.
- 498 Goldwater, S., L Griffiths, T., and Johnson, M. (2009). A Bayesian framework for word segmentation: Exploring the  
499 effects of context. *Cognition*, 112:21–54.
- 500 Harris, Z. S. (1945). Discontinuous morphemes. *Language*, 21(3):121–127.

- 501 Hochreiter, S. and Schmidhuber, J. (1997). Long short-term memory. *Neural Computation*, 9(8):1735–1780.
- 502 Hornik, K. (1991). Approximation capabilities of multilayer feedforward networks. *Neural Networks*, 4(2):251–257.
- 503 Hosino, T. and Okanoya, K. (2000). Lesion of a higher-order song nucleus disrupts phrase level complexity in bengalese  
504 finches. *Neuroreport*, 11(10):2091–2095.
- 505 Jaeger, H. and Haas, H. (2004). Harnessing nonlinearity: Predicting chaotic systems and saving energy in wireless  
506 communication. *Science*, 304(5667):78–80.
- 507 Jang, E., Gu, S., and Poole, B. (2017). Categorical reparameterization with Gumbel-softmax. In *5th International Con-*  
508 *ference on Learning Representations, ICLR 2017, Toulon, France, April 24-26, 2017, Conference Track Proceedings*.
- 509 Janik, V. M. (1999). Pitfalls in the categorization of behaviour: a comparison of dolphin whistle classification methods.  
510 *Animal Behaviour*, 57(1):133–143.
- 511 Jin, L., Gupta, M. M., and Nikiforuk, P. N. (1995). Universal approximation using dynamic recurrent neural networks:  
512 discrete-time version. In *Proceedings of ICNN'95 - International Conference on Neural Networks*, volume 1, pages  
513 403–408.
- 514 Kakishita, Y., Sasahara, K., Nishino, T., Takahasi, M., and Okanoya, K. (2007). Pattern extraction improves automata-  
515 based syntax analysis in songbirds. *Lecture Notes in Artificial Intelligence*, 4828:320–332.
- 516 Kamper, H., Jansen, A., and Goldwater, S. (2017). A segmental framework for fully-unsupervised large-vocabulary  
517 speech recognition. *Computer Speech & Language*, 46:154–174.
- 518 Katahira, K., Suzuki, K., Okanoya, K., and Okada, M. (2011). Complex sequencing rules of birdsong can be explained  
519 by simple hidden Markov processes. *PLoS ONE*, 6(9):1–9.
- 520 Katz, S. M. (1987). Estimation of probabilities from sparse data for the language model component of a speech  
521 recognizer. *IEEE Transactions on Acoustics, Speech, and Signal Processing*, 35(3):400–401.
- 522 Kemp, C., Perfors, A., and Tenenbaum, J. (2007). Learning overhypotheses with hierarchical Bayesian models.  
523 *Developmental Science*, 10(3):307–321.
- 524 Kershenbaum, A., Blumstein, D. T., Roch, M. A., Akçay, Ç., Backus, G., Bee, M. A., Bohn, K., Cao, Y., Carter, G.,  
525 Căsar, C., Coen, M., DeRuiter, S. L., Doyle, L., Edelman, S., Ferrer-i Cancho, R., Freeberg, T. M., Garland, E. C.,  
526 Gustison, M., Harley, H. E., Huetz, C., Hughes, M., Hyland Bruno, J., Ilany, A., Jin, D. Z., Johnson, M., Ju, C.,  
527 Karnowski, J., Lohr, B., Manser, M. B., McCowan, B., Mercado, E., Narins, P. M., Piel, A., Rice, M., Salmi, R.,  
528 Sasahara, K., Sayigh, L., Shiu, Y., Taylor, C., Vallejo, E. E., Waller, S., and Zamora-Gutierrez, V. (2016). Acoustic  
529 sequences in non-human animals: a tutorial review and prospectus. *Biological Reviews*, 91(1):13–52.
- 530 Kershenbaum, A., Bowles, A. E., Freeberg, T. M., Jin, D. Z., Lameira, A. R., and Bohn, K. (2014). Animal vocal  
531 sequences: not the Markov chains we thought they were. *Proceedings of the Royal Society of London B: Biological*  
532 *Sciences*, 281(1792).
- 533 Khalighinejad, B., Cruzatto da Silva, G., and Mesgarani, N. (2017). Dynamic encoding of acoustic features in neural  
534 responses to continuous speech. *Journal of Neuroscience*, 37(8):2176–2185.
- 535 Khandelwal, U., He, H., Qi, P., and Jurafsky, D. (2018). Sharp nearby, fuzzy far away: How neural language models  
536 use context. In *Proceedings of the 56th Annual Meeting of the Association for Computational Linguistics (Volume 1:*  
537 *Long Papers)*, pages 284–294, Melbourne, Australia. Association for Computational Linguistics.
- 538 Kingma, D. P. and Welling, M. (2014). Auto-encoding variational bayes. *The International Conference on Learning*  
539 *Representations (ICLR) 2014*.
- 540 Kneser, R. and Ney, H. (1995). Improved backing-off for n-gram language modeling. In *Proceedings of the IEEE*  
541 *International Conference on Acoustics, Speech and Signal*, volume 1, pages 181–184.
- 542 Kojima, S. (2003). *A Search for the Origin of Human Speech: Auditory and Vocal Functions of Chimpanzee*. Trans  
543 Pacific Press and Kyoto University Press, Rosanna, Melbourne; Kyoto.
- 544 Kurihara, K. and Sato, T. (2004). An application of the variational Bayesian approach to probabilistic context-free  
545 grammars. In *International Joint Conference on Natural Language Processing Workshop Beyond Shallow Analyses*.
- 546 Kurihara, K. and Sato, T. (2006). Variational Bayesian grammar induction for natural language. In Sakakibara, Y.,  
547 Kobayashi, S., Sato, K., Nishino, T., and Tomita, E., editors, *Grammatical Inference: Algorithms and Applications:*  
548 *8th International Colloquium, ICGI 2006, Tokyo, Japan, September 20-22, 2006. Proceedings*, pages 84–96. Springer  
549 Berlin Heidelberg, Berlin, Heidelberg.
- 550 Kuypers, H. G. J. M. (1958). Corticobulbar connexions to the pons and lower brain-stem in man: an anatomical study.  
551 *Brain*, 81(3):364–388.

- 552 Landis, J. R. and Koch, G. G. (1977). The measurement of observer agreement for categorical data. *Biometrics*,  
553 33(1):159–174.
- 554 Larson, B. (2017). Long distance dependencies. Oxford Bibliographies.
- 555 Levenshtein, V. I. (1966). Binary codes capable of correcting deletions, insertions and reversals. *Soviet Physics Doklady*,  
556 10(8):707–710.
- 557 Liebal, K., Pika, S., and Tomasello, M. (2006). Gestural communication of orangutans (*Pongo pygmaeus*). *Gesture*,  
558 6(1):1–38.
- 559 Lin, H. W. and Tegmark, M. (2017). Critical behavior in physics and probabilistic formal languages. *Entropy*, 19(7):299.
- 560 Little, M. A. (2019). *Machine Learning for Signal Processing: Data Science, Algorithms, and Computational Statistics*.  
561 Oxford University Press.
- 562 Lu, Z., Pu, H., Wang, F., Hu, Z., and Wang, L. (2017). The expressive power of neural networks: A view from the  
563 width. In Guyon, I., Luxburg, U. V., Bengio, S., Wallach, H., Fergus, R., Vishwanathan, S., and Garnett, R., editors,  
564 *Advances in Neural Information Processing Systems 30*, pages 6231–6239. Curran Associates, Inc.
- 565 Maass, W., Natschläger, T., and Markram, H. (2002). Real-time computing without stable states: A new framework for  
566 neural computation based on perturbations. *Neural Computation*, 14(11):2531–2560.
- 567 Markowitz, J. E., Ivie, E., Kligler, L., and Gardner, T. J. (2013). Long-range order in canary song. *PLOS Computational  
568 Biology*, 9(5):1–12.
- 569 Mielke, A. and Zuberbühler, K. (2013). A method for automated individual, species and call type recognition in  
570 free-ranging animals. *Animal Behaviour*, 86(2):475–482.
- 571 Mikolov, T., Chen, K., Corrado, G. S., and Dean, J. (2013). Efficient estimation of word representations in vector space.  
572 arXiv:1301.3781.
- 573 Miyagawa, S., Berwick, R., and Okanoya, K. (2013). The emergence of hierarchical structure in human language.  
574 *Frontiers in Psychology*, 4:71.
- 575 Miyagawa, S., Ojima, S., Berwick, R. C., and Okanoya, K. (2014). The integration hypothesis of human language  
576 evolution and the nature of contemporary languages. *Frontiers in Psychology*, 5:564.
- 577 Morita, T. and Koda, H. (2019). Superregular grammars do not provide additional explanatory power but allow for a  
578 compact analysis of animal song. *Royal Society Open Science*, 6(7):190139. Preprinted in arXiv:1811.02507.
- 579 Morita, T. and Koda, H. (2020). Difficulties in analysing animal song under formal language theory framework:  
580 comparison with metric-based model evaluation. *Royal Society Open Science*, 7(2):192069.
- 581 Morita, T. and O’Donnell, T. J. (To appear). Statistical evidence for learnable lexical subclasses in Japanese. *Linguistic  
582 Inquiry*. Accepted with major revisions.
- 583 Natschläger, T., Markram, H., and Maass, W. (2003). Computer models and analysis tools for neural microcircuits. In  
584 Kötter, R., editor, *Neuroscience Databases: A Practical Guide*, pages 123–138. Springer US, Boston, MA.
- 585 Nishikawa, J., Okada, M., and Okanoya, K. (2008). Population coding of song element sequence in the Bengalese finch  
586 hvc. *European Journal of Neuroscience*, 27(12):3273–3283.
- 587 Nishikawa, J. and Okanoya, K. (2006). Dynamical neural representation of song syntax in bengalese finch: a model  
588 study. *Ornithological Science*, 5(1):95–103.
- 589 Nóbrega, V. A. and Miyagawa, S. (2015). The precedence of syntax in the rapid emergence of human language in  
590 evolution as defined by the integration hypothesis. *Frontiers in Psychology*, 6:271.
- 591 O’Donnell, T. J. (2015). *Productivity and reuse in language : a theory of linguistic computation and storage*. MIT  
592 Press, Cambridge, MA; London, England.
- 593 Okanoya, K. (2004). Song syntax in Bengalese finches: proximate and ultimate analyses. *Advances in the Study of  
594 Behavior*, 34:297–345.
- 595 Okanoya, K. (2007). Language evolution and an emergent property. *Current Opinion in Neurobiology*, 17(2):271–276.  
596 Cognitive neuroscience.
- 597 Okanoya, K. and Merker, B. (2007). Neural substrates for string-context mutual segmentation: A path to human  
598 language. In Lyon, C., Nehaniv, C. L., and Cangelosi, A., editors, *Emergence of Communication and Language*,  
599 pages 421–434. Springer London, London.
- 600 Ouattara, K., Lemasson, A., and Zuberbühler, K. (2009). Campbell’s monkeys use affixation to alter call meaning.  
601 *PLOS ONE*, 4(11):1–7.

- 602 Payne, R. S. and McVay, S. (1971). Songs of humpback whales. *Science*, 173(3997):585–597.
- 603 Perfors, A., Tenenbaum, J., L Griffiths, T., and Xu, F. (2011a). A tutorial introduction to bayesian models of cognitive  
604 development. *Cognition*, 120:302–321.
- 605 Perfors, A., Tenenbaum, J. B., and Regier, T. (2011b). The learnability of abstract syntactic principles. *Cognition*,  
606 118(3):306–338.
- 607 Prather, J. F., Peters, S., Nowicki, S., and Mooney, R. (2008). Precise auditory–vocal mirroring in neurons for learned  
608 vocal communication. *Nature*, 451(7176):305–310.
- 609 Rabin, M. O. and Scott, D. (1959). Finite automata and their decision problems. *IBM Journal of Research and*  
610 *Development*, 3(2):114–125.
- 611 Rabiner, L. R. (1989). A tutorial on hidden Markov models and selected applications in speech recognition. *Proceedings*  
612 *of the IEEE*, 77:257–286.
- 613 Rao, K., Sak, H., and Prabhavalkar, R. (2017). Exploring architectures, data and units for streaming end-to-end speech  
614 recognition with rnn-transducer. In *2017 IEEE Automatic Speech Recognition and Understanding Workshop, ASRU*  
615 *2017, Okinawa, Japan, December 16-20, 2017*, pages 193–199.
- 616 Roseberg, A. and Hirschberg, J. (2007). V-measure: A conditional entropy-based external cluster evaluation measure.
- 617 Ryeu, J. K., Aihara, K., and Tsuda, I. (2001). Fractal encoding in a chaotic neural network. *Phys. Rev. E*, 64:046202.
- 618 Sainburg, T., Theilman, B., Thielk, M., and Gentner, T. Q. (2019a). Parallels in the sequential organization of birdsong  
619 and human speech. *Nature Communications*, 10(3636).
- 620 Sainburg, T., Thielk, M., and Gentner, T. Q. (2019b). Latent space visualization, characterization, and generation of  
621 diverse vocal communication signals. *bioRxiv*.
- 622 Scholes, E. I. (2006). Courtship Ethology of Carola’s Parotia (Parotia Carolae). *The Auk*, 123(4):967–990.
- 623 Scholes, E. I. (2008). Evolution of the courtship phenotype in the bird of paradise genus Parotia (Aves: Paradisaeidae):  
624 homology, phylogeny, and modularity. *Biological Journal of the Linnean Society*, 94(3):491–504.
- 625 Schuster, M. and Paliwal, K. K. (1997). Bidirectional recurrent neural networks. *IEEE Transactions on Signal*  
626 *Processing*, 45(11):2673–2681.
- 627 Seyfarth, R., Cheney, D., and Marler, P. (1980). Monkey responses to three different alarm calls: evidence of predator  
628 classification and semantic communication. *Science*, 210(4471):801–803.
- 629 Silveira, N., Dozat, T., de Marneffe, M.-C., Bowman, S., Connor, M., Bauer, J., and Manning, C. (2014). A gold standard  
630 dependency corpus for English. In *Proceedings of the Ninth International Conference on Language Resources and*  
631 *Evaluation (LREC’14)*, pages 2897–2904, Reykjavik, Iceland. European Language Resources Association (ELRA).
- 632 Suzuki, R., Buck, J. R., and Tyack, P. L. (2006). Information entropy of humpback whale songs. *The Journal of the*  
633 *Acoustical Society of America*, 119(3):1849–1866.
- 634 Suzuki, T. N., Wheatcroft, D., and Griesser, M. (2016). Experimental evidence for compositional syntax in bird calls.  
635 *Nature Communications*, 7(1):10986.
- 636 Tachibana, R. O., Koumura, T., and Okanoya, K. (2015). Variability in the temporal parameters in the song of the  
637 bengalese finch (*Lonchura striata* var. *domestica*). *Journal of Comparative Physiology A*, 201(12):1157–1168.
- 638 Tachibana, R. O., Oosugi, N., and Okanoya, K. (2014). Semi-automatic classification of birdsong elements using a  
639 linear support vector machine. *PLOS ONE*, 9(3):1–8.
- 640 Tanner, J. E. and Byrne, R. W. (1996). Representation of action through iconic gesture in a captive lowland gorilla.  
641 *Current Anthropology*, 37(1):162–173.
- 642 Teh, Y. W. (2006). A hierarchical Bayesian language model based on Pitman-Yor processes. In *Proceedings of*  
643 *the 21st International Conference on Computational Linguistics and the 44th Annual Meeting of the Association*  
644 *for Computational Linguistics*, ACL-44, pages 985–992, Stroudsburg, PA, USA. Association for Computational  
645 Linguistics.
- 646 Teh, Y. W., Jordan, M. I., Beal, M. J., and Blei, D. M. (2006). Hierarchical Dirichlet processes. *Journal of the American*  
647 *Statistical Association*, 101(476):1566–1581.
- 648 Tjandra, A., Sisman, B., Zhang, M., Sakti, S., Li, H., and Nakamura, S. (2019). VQVAE unsupervised unit discovery  
649 and multi-scale Code2Spec inverter for Zerospeech Challenge 2019.
- 650 Tsuda, I. (2001). Toward an interpretation of dynamic neural activity in terms of chaotic dynamical systems. *Behavioral*  
651 *and Brain Sciences*, 24(5):793–810.



- 652 van den Oord, A., Vinyals, O., and Kavukcuoglu, K. (2017). Neural discrete representation learning. In Guyon, I.,  
653 Luxburg, U. V., Bengio, S., Wallach, H., Fergus, R., Vishwanathan, S., and Garnett, R., editors, *Advances in Neural*  
654 *Information Processing Systems 30*, pages 6306–6315. Curran Associates, Inc.
- 655 van Lawick-Goodall, J. (1968). The behaviour of free-living chimpanzees in the Gombe stream reserve. *Animal*  
656 *Behaviour Monographs*, 1:161–311.
- 657 Vaswani, A., Shazeer, N., Parmar, N., Uszkoreit, J., Jones, L., Gomez, A. N., Kaiser, L. u., and Polosukhin, I. (2017).  
658 Attention is all you need. In Guyon, I., Luxburg, U. V., Bengio, S., Wallach, H., Fergus, R., Vishwanathan, S., and  
659 Garnett, R., editors, *Advances in Neural Information Processing Systems 30*, pages 5998–6008. Curran Associates,  
660 Inc.
- 661 Wang, X., Takaki, S., and Yamagishi, J. (2020). Neural source-filter waveform models for statistical parametric speech  
662 synthesis. *IEEE/ACM Transactions on Audio, Speech, and Language Processing*, 28:402–415.
- 663 Warren, T. L., Charlesworth, J. D., Tumer, E. C., and Brainard, M. S. (2012). Variable sequencing is actively maintained  
664 in a well learned motor skill. *Journal of neuroscience*, 32(44):15414–15425.
- 665 Wild, J., Li, D., and Eagleton, C. (1997). Projections of the dorsomedial nucleus of the intercollicular complex (dm) in  
666 relation to respiratory-vocal nuclei in the brainstem of pigeon (*columba livia*) and zebra finch (*taeniopygia guttata*).  
667 *Journal of Comparative Neurology*, 377(3):392–413.
- 668 Zhao, T., Zhao, R., and Eskenazi, M. (2017). Learning discourse-level diversity for neural dialog models using  
669 conditional variational autoencoders. In *Proceedings of the 55th Annual Meeting of the Association for Computational*  
670 *Linguistics (Volume 1: Long Papers)*, pages 654–664. Association for Computational Linguistics.
